# Supplementary material
Source: Springer Nature journal article supplement (https://www.springermedizin.de/resource/supplementary/12890_2014_549_MOESM1_ESM.pdf/9505280)
Supplement: MOESM1 [file 9505280]

**Total study population enrolled**

N = 2733

**Exclusions from safety population**

N

%

Ineligible as a result of quality review

135

4.9

No information on moxifloxacin intake

3

0.1

**Safety population**

N = 2595 (100.0%)

**Exclusions from efficacy population**

N\*

%

Lost to follow up

1

&lt;0.1

Age &lt;18 years

9

0.3

Only oral moxifloxacin treatment

13

0.5

No CAP diagnosis

170

6.6

Concomitant anti-infective treatment

296

11.4

Manual exclusion due to implausible data

1

&lt;0.1

\*Multiple responses

**Efficacy population**

N = 2152 (82.9%)
